# Supplementary material
Source: PubMed Central journal article supplement (PMC6642374)
Supplement: pnas.1902087116.sapp.pdf [file pnas.1902087116.sapp.pdf]

## Supplementary Information for

**Title:** Insula serotonin 2A receptor binding and gene expression contribute to serotonin transporter polymorphism anxious phenotype in primates

**Short title:** Insula serotonin 2A receptor and anxiety

Andrea M. Santangelo<sup>a,b</sup>, Stephen J. Sawiak<sup>a,b,c</sup>, Tim Fryer<sup>c</sup>, Young Hong<sup>c</sup>, Yoshiro Shiba<sup>a</sup>, Hannah F. Clarke<sup>a,b</sup>, Patrick Riss<sup>c</sup>, Valentina Ferrari<sup>c</sup>, Roger Tait<sup>b</sup>, John Suckling<sup>c</sup>, Franklin I. Aigbirhio<sup>c</sup> and Angela C. Roberts<sup>a,b</sup>.

<sup>a</sup>Department of Physiology, Development and Neuroscience, University of Cambridge, Cambridge, CB2 3DY, UK.

<sup>b</sup>Behavioural and Clinical Neuroscience Institute, University of Cambridge, Cambridge, CB2 3EB, UK.

<sup>c</sup>Department of Clinical Neuroscience, Wolfson Brain Imaging Centre, University of Cambridge, CB2 0QQ, UK.

**Corresponding author:** Dr Andrea M. Santangelo, Department of Physiology, Development and Neuroscience, University of Cambridge, Cambridge, CB2 3DY, UK. Email: [as966@cam.ac.uk](mailto:as966@cam.ac.uk)

### **This PDF file includes:**

Figs. S1 to S5

Tables S1 to S3

## Supplementary figure 1

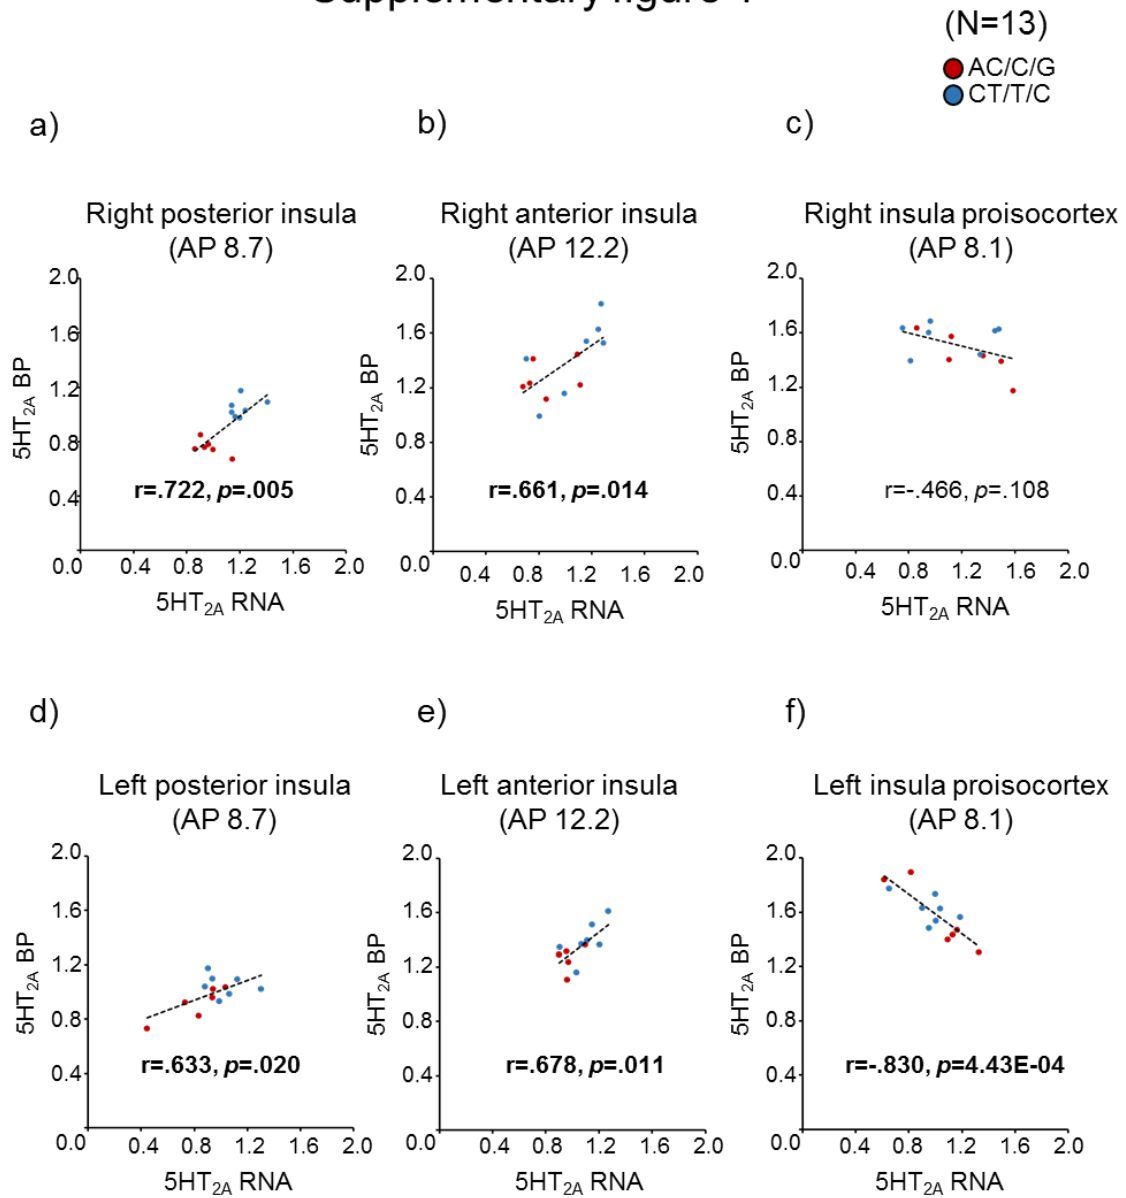

**Supplementary figure 1:** Correlations between 5HT<sub>2A</sub> BP and RNA expression levels for the right **a-c**) and left **d-f**) posterior insula (AP 8.7), anterior insula (AP 12.2) and insula proisocortex (AP 8.1) regions. Pearson correlation (N=13),  $p < .05$  was considered significant, highlighted in bold.

## Supplementary Figure 2

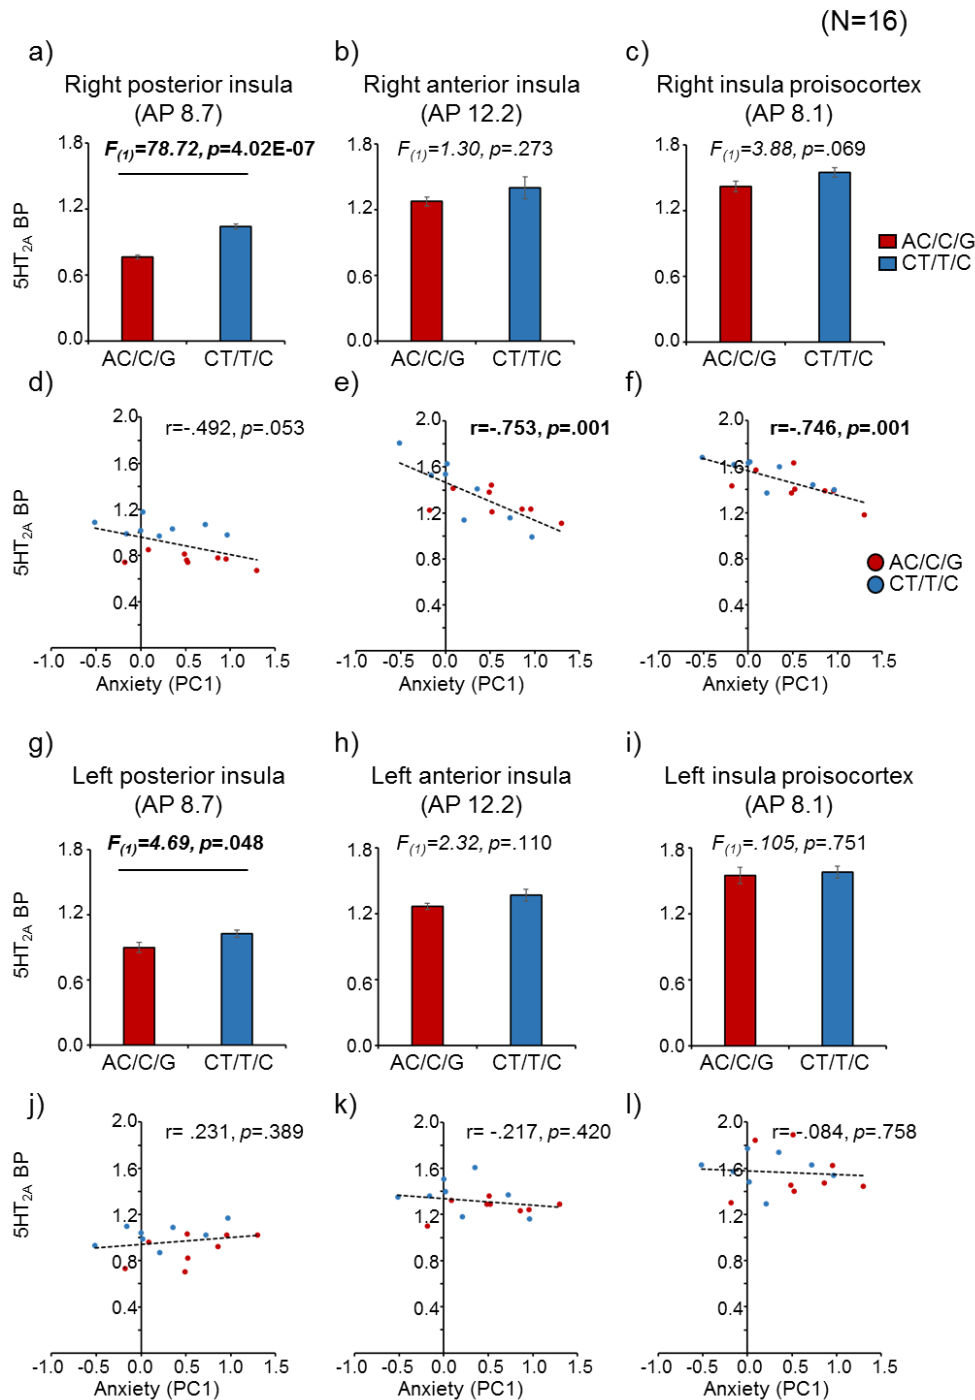

**Supplementary figure 2:** 5HT<sub>2A</sub> BP comparison between *SLC6A4* homozygous genotypes (a-c, right; g-i, left) and correlations with anxiety scores in the human intruder test (d-f, right; j-l, left) for the posterior insula (AP 8.7), anterior insula (AP 12.2) and insula proisocortex (AP 8.1) regions. One-way ANOVA and Pearson correlation, respectively. N=16,  $p<.05$  was considered significant, highlighted in bold.

## Supplementary Figure 3

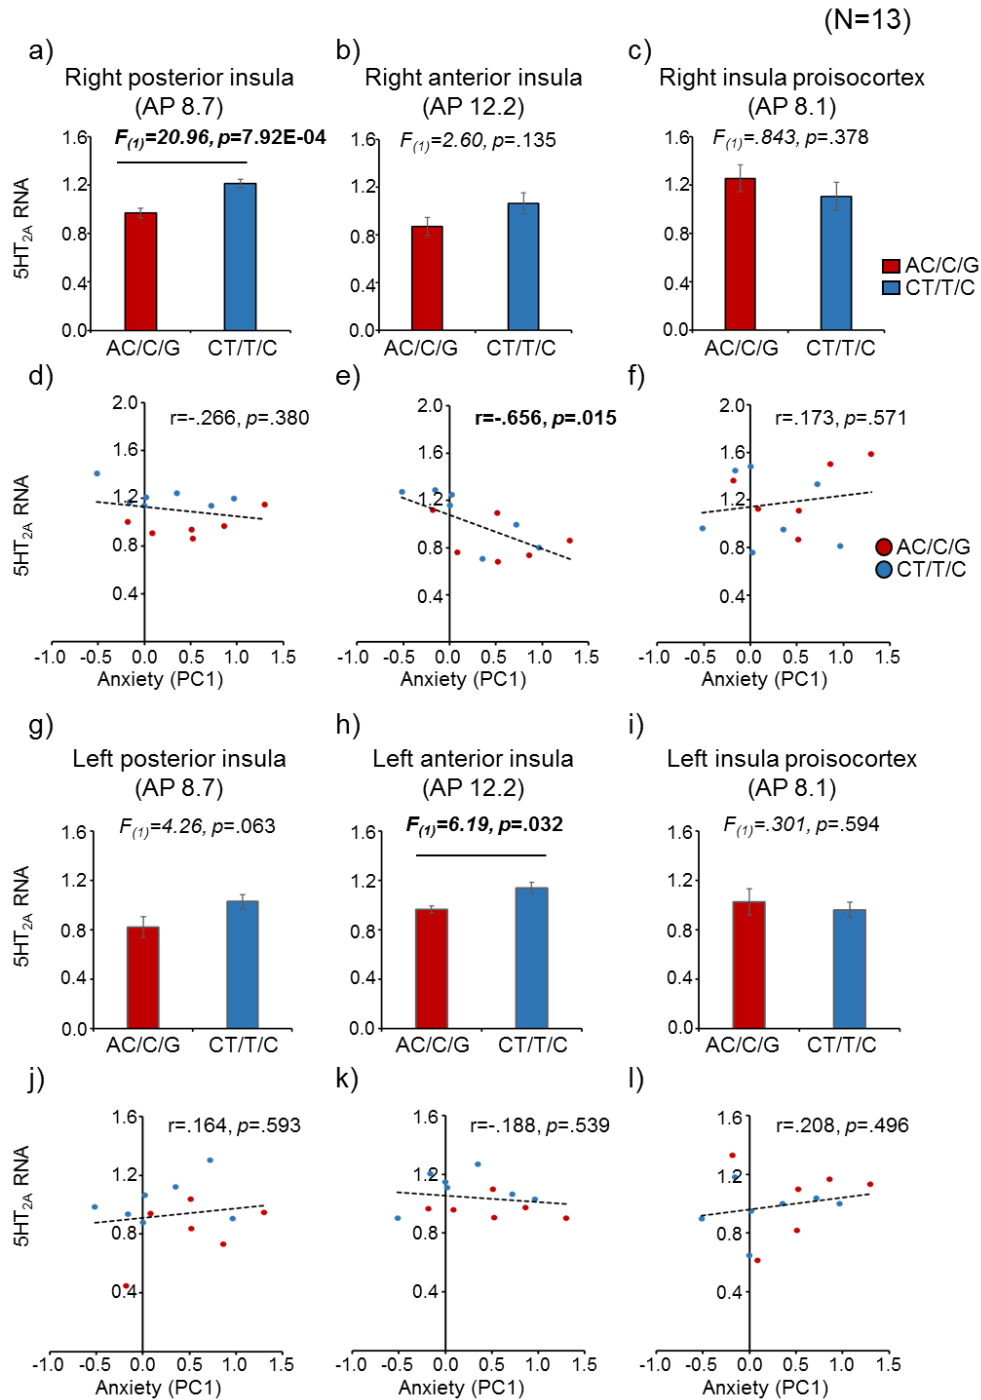

### Supplementary figure 3: 5HT<sub>2A</sub> RNA expression comparison between *SLC6A4*

homozygous genotypes (**a-c**, right; **g-i**, left) and correlations with anxiety scores in the human intruder test (**d-f**, right; **j-l**, left) for the posterior insula (AP 8.7), anterior insula (AP 12.2) and insula prouisocortex (AP 8.1) regions. One-way ANOVA and Pearson correlation, respectively. N=13,  $p<.05$  was considered significant, highlighted in bold.

## Supplementary Figure 4

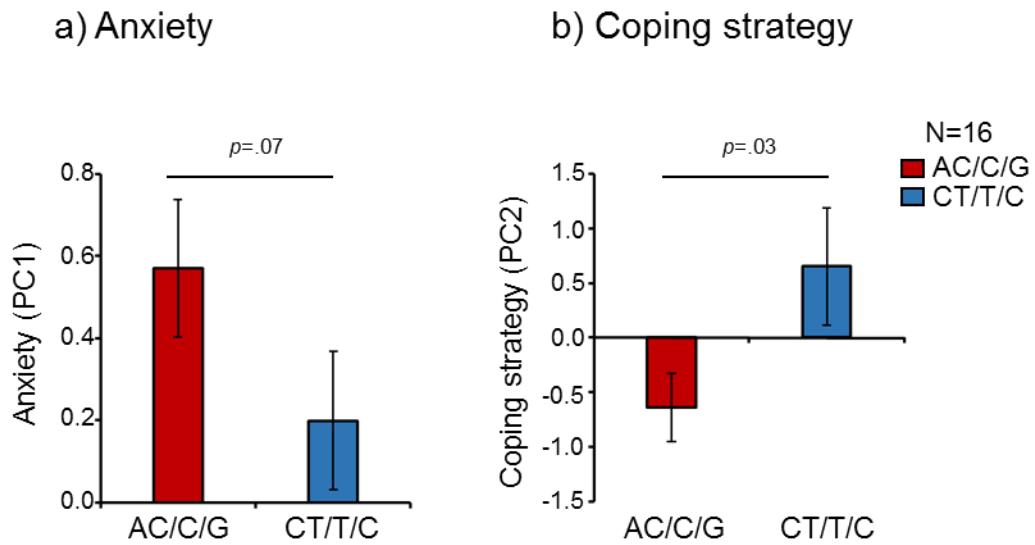

**Supplementary figure 4:** Comparison between marmosets homozygous for each *SLC6A4* haplotypes AC/C/G and CT/T/C, for **a)** anxiety scores (PC1), **b)** coping strategy scores (PC2) measured with the human intruder test, within this study cohort (N=16), 1-tailed t test,  $p < .05$  was considered significant.

## Supplementary Figure 5

### a) Right posterior insula

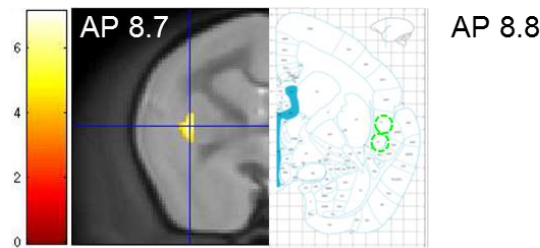

### b) Right anterior insula

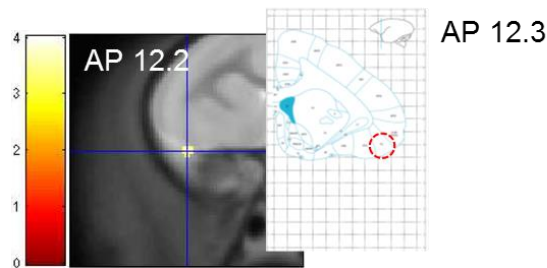

### c) Right insula proisocortex

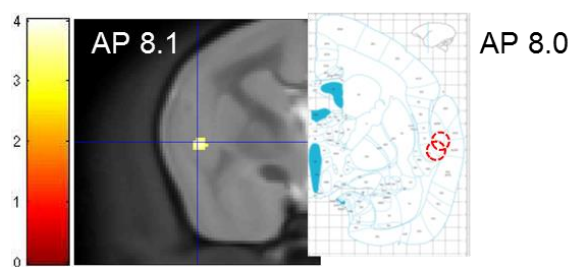

**Supplementary figure 5:** Schematics of the location of the punches extracted from frozen 200 $\mu$ m-thick brain sections to use in RNA expression measurements. **a)** right posterior insula, **b)** right anterior insula and **c)** right insula proisocortex. Left panels show the clusters obtained with the voxel-base analysis centered in the peak of significance, with antero-posterior (AP) coordinates from ref. 70. Right panels show the corresponding location in a marmoset brain atlas (70). Depicted in green, punches for the genotype contrast analysis (AC/C/G vs CT/T/C) and in red for the correlational analysis with anxiety scores (PC1). Punches of 1.5 mm were used for a) and c), and 2 mm for b). Punches were taken from 600 $\mu$ m anterior to 600 $\mu$ m posterior to the location of the most significant peak (shown in the pictures).

**Table S1**

| <b>Table S1: Variables measured in human intruder test</b> |               |               |
|------------------------------------------------------------|---------------|---------------|
| <b>Measures</b>                                            | <b>AC/C/G</b> | <b>CT/T/C</b> |
| Average distance (cm)                                      | 88.85±3.25    | 84.05±3.47    |
| Locomotion (%) (*)                                         | 3.98±0.67     | 8.21±1.65     |
| Bobbing (*)                                                | 65.13±7.59    | 28.25±7.17    |
| Jumps                                                      | 1±0.46        | 1±0.57        |
| Tsik calls                                                 | 1.38±0.82     | 8.38±3.88     |
| Egg calls (*)                                              | 23.75±5.21    | 12.25±3.04    |
| Tsik-Egg calls                                             | 14±6.64       | 20.75±7.65    |
| Tse-like calls                                             | 5.13±3.05     | 9.88±4.66     |
| PC1 (†)                                                    | 0.57±0.17     | 0.20±0.17     |
| PC2 (*)                                                    | -0.64±0.31    | 0.65±0.54     |

Mean±SEM, AC/C/G vs CT/T/C, 1-tailed t test (\*)  $p < .05$ ; (†)  $p = .07$

Table S2

| Measures                 | AC/C/G     |            |                     |                      | CT/T/C      |            |            |                     |                      |            |
|--------------------------|------------|------------|---------------------|----------------------|-------------|------------|------------|---------------------|----------------------|------------|
|                          | V average  | V 1        | M100907<br>0.1mg/kg | M100907<br>0.3 mg/kg | V 2         | V average  | V 1        | M100907<br>0.1mg/kg | M100907<br>0.3 mg/kg | V 2        |
| <b>Average distance*</b> | 67.08±2.52 | 69.31±4.57 | 68.93±7.39          | 78.59±5.56           | 65.43±2.17  | 64.77±1.48 | 66.94±3.37 | 64.11±3.08          | 62.82±3.18           | 62.59±2.37 |
| Locomotion (%)           | 4.19±1.15  | 3.39±1.09  | 4.10±1.46           | 3.19±0.87            | 5.22±1.91   | 6.47±0.67  | 5.30±1.17  | 6.06±0.95           | 6.18±0.89            | 7.64±1.29  |
| Bobbing                  | 34.17±8.71 | 38.00±8.68 | 29.17±8.60          | 29.67±10.78          | 31.40±11.40 | 11.71±6.02 | 19.00±9.99 | 14.43±6.97          | 8.71±3.26            | 4.43±2.17  |
| Jumps                    | 4.33±1.49  | 4.00±1.75  | 4.00±1.29           | 3.67±1.26            | 4.60±2.34   | 6.07±1.20  | 5.71±1.21  | 6.71±1.52           | 5.86±2.10            | 6.43±2.29  |
| Tsik calls               | 2.08±1.04  | 2.33±1.17  | 6.50±3.13           | 1.50±0.67            | 2.00±1.14   | 12.79±3.06 | 12.14±3.40 | 17.00±5.94          | 9.86±2.34            | 13.43±3.99 |
| Egg calls                | 7.50±3.86  | 7.83±3.23  | 8.17±3.65           | 11.00±8.66           | 7.40±5.69   | 3.93±1.64  | 5.00±1.75  | 6.29±3.31           | 6.29±3.41            | 2.86±1.62  |
| Tsik-Egg calls           | 18.08±6.11 | 20.17±7.14 | 20.83±8.77          | 19.67±10.41          | 13.00±6.24  | 11.93±4.44 | 17.14±6.11 | 11.71±6.17          | 6.00±2.84            | 6.71±3.67  |
| Tse-like calls           | 5.83±1.80  | 7.17±1.99  | 6.67±2.14           | 11.00±3.79           | 2.80±1.16   | 8.50±2.83  | 9.43±4.85  | 13.29±5.41          | 16.43±4.41           | 7.57±2.19  |
| PC1                      | 0.04±0.33  | 0.27±0.43  | 0.15±0.38           | 0.58±0.41            | -0.25±0.36  | -0.56±0.12 | -0.23±0.31 | -0.44±0.23          | -0.52±0.29           | -0.89±0.26 |
| PC2                      | -0.47±0.44 | -0.44±0.39 | -0.11±0.60          | -0.65±0.77           | -0.60±0.61  | 0.39±0.25  | 0.37±0.31  | 0.49±0.53           | -0.02±0.21           | 0.41±0.26  |

\* AC/C/G group, V average vs M100907 0.3 mg/kg, paired t-test p<.05

V1 and V2 first and last vehicle administration, V average=(V1 + V2)/2



**Table S3**

| <b>Table S3: Sequences of primers used in the real timePCR</b> |                                            |                                                        |
|----------------------------------------------------------------|--------------------------------------------|--------------------------------------------------------|
| <b>Gene symbol</b>                                             | <b>Gene name</b>                           | <b>Sequence (5'→3')</b>                                |
| <i>HTR2A</i>                                                   | Serotonin 2A receptor                      | F: GCAGAATGCCACCAACTATT<br>R: GGAATATGCGCCCATAGAGA     |
| <i>ACTB</i>                                                    | β-Actin                                    | F: AGCAGTCGGTTGGAGCGAGCAT<br>R: TGGCTTTTGGGAGGGCAAGGGA |
| <i>TBP</i>                                                     | TATA box binding protein                   | F: GCCCGAAATGCCGAATATAA<br>R: TTCTTCACTCTTGGCTCCTGTG   |
| <i>GAPDH</i>                                                   | Glyceraldehyde-3-phosphate                 | F: TAAGACCCCCTGGACCATCAGCC<br>R: GGGGCAATTCGGTGTGGTGA  |
| <i>SDHA</i>                                                    | Succinate dehydrogenase complex, subunit A | F: TGGGAACAAGAGGGCATCTG<br>R: CCACCACGGCATCAAATTCATG   |
